# Supplementary material for: The YfkO Nitroreductase from Bacillus Licheniformis on Gold-Coated Superparamagnetic Nanoparticles: Towards a Novel Directed Enzyme Prodrug Therapy Approach
Source: MDPI journal article supplement (doi:10.3390/pharmaceutics13040517), 2021-04-09
Supplement: s1 [file s1]

# Supplementary Materials: The YfkO Nitroreductase from *Bacillus Licheniformis* on Gold-Coated Superparamagnetic Nanoparticles: Towards a Novel Directed Enzyme Prodrug Therapy Approach

Patrick Ball <sup>1</sup>, Robert Hobbs <sup>1</sup>, Simon Anderson <sup>1</sup>, Emma Thompson <sup>1</sup>, Vanessa Gwenin <sup>1</sup>, Christopher Von Ruhland <sup>2</sup> and Christopher Gwenin <sup>1,3,\*</sup>

**Publisher's Note:** MDPI stays neutral with regard to jurisdictional claims in published maps and institutional affiliations.

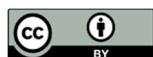

**Copyright:** © 2020 by the authors. Submitted for possible open access publication under the terms and conditions of the Creative Commons Attribution (CC BY) license (<http://creativecommons.org/licenses/by/4.0/>).

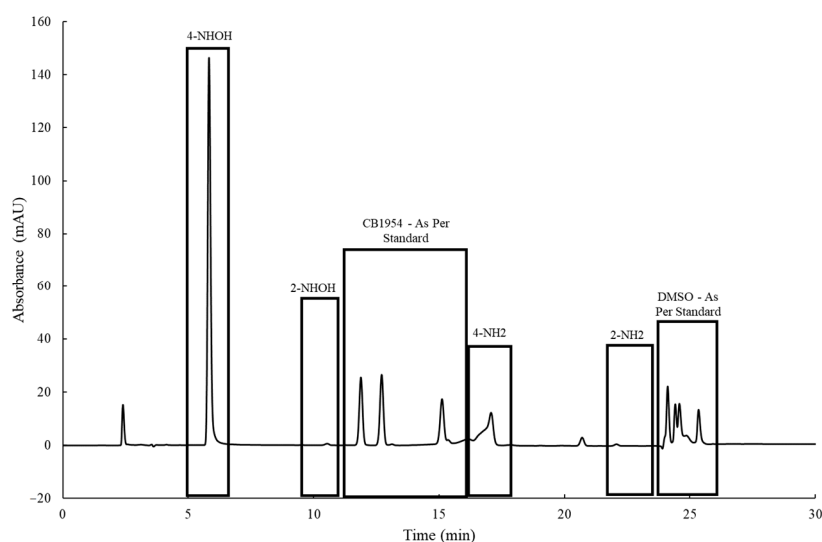

**Figure S1.** HPLC chromatogram for YfkO-Cys.

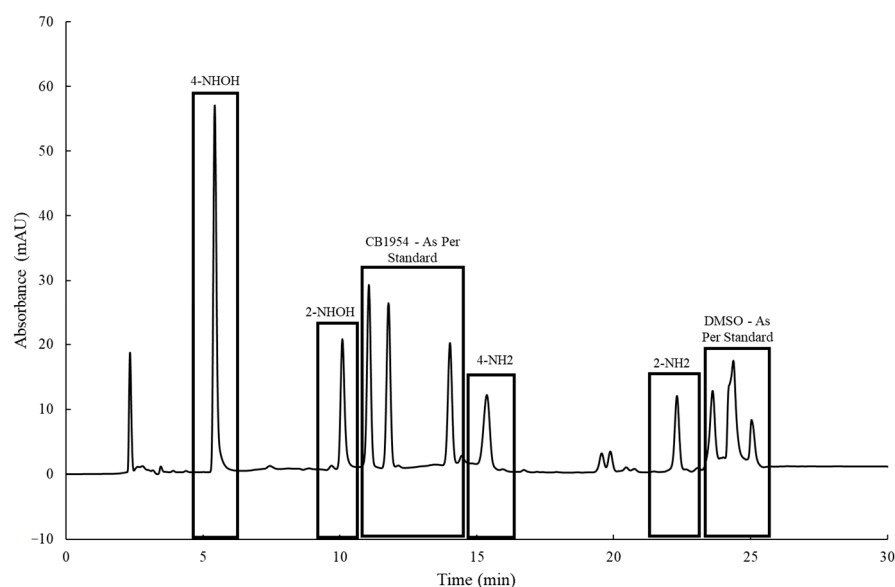

**Figure S2.** HPLC chromatogram for NfnB-Cys.

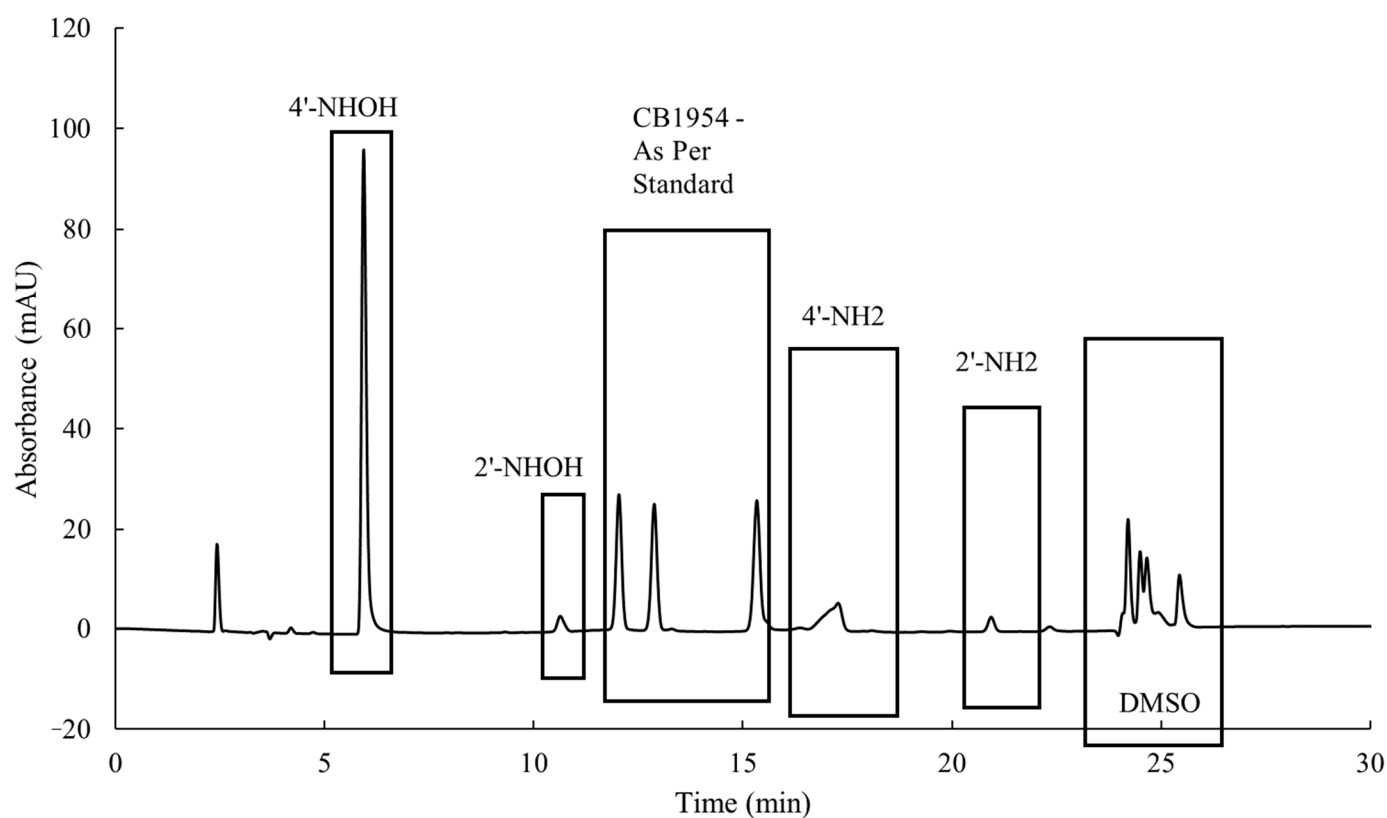

**Figure S3.** HPLC chromatogram for Immobilized YfkO-Cys.

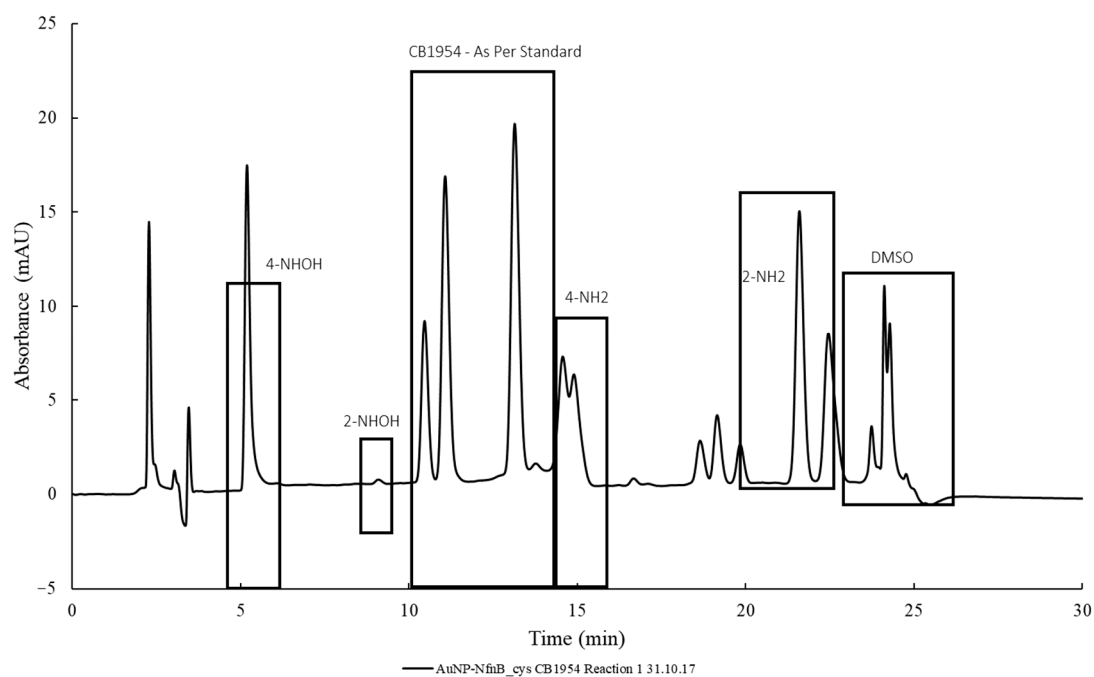

**Figure S4.** HPLC chromatogram for Immobilized NfnB-Cys.

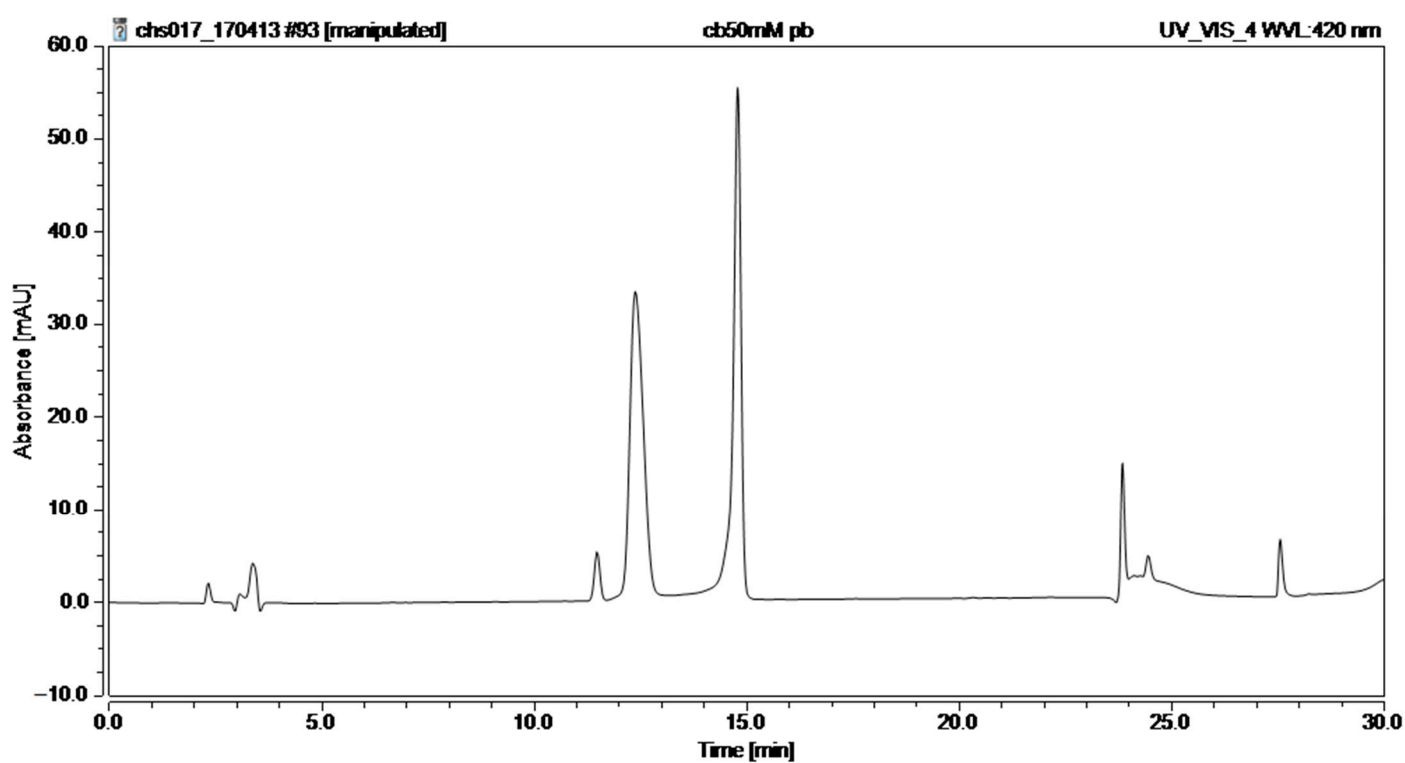

Figure S5. HPLC of a CB1954 standard.

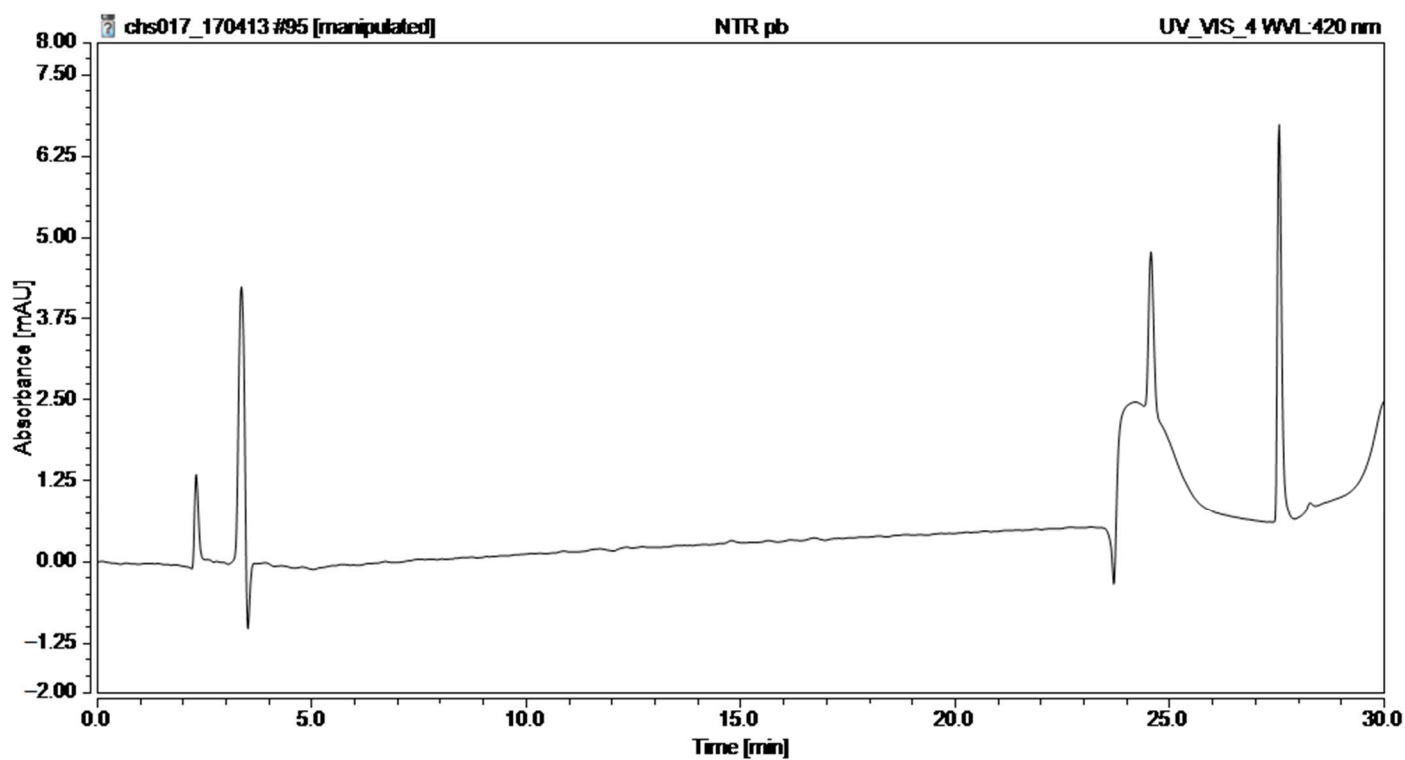

Figure S6. HPLC of a nitroreductase standard.

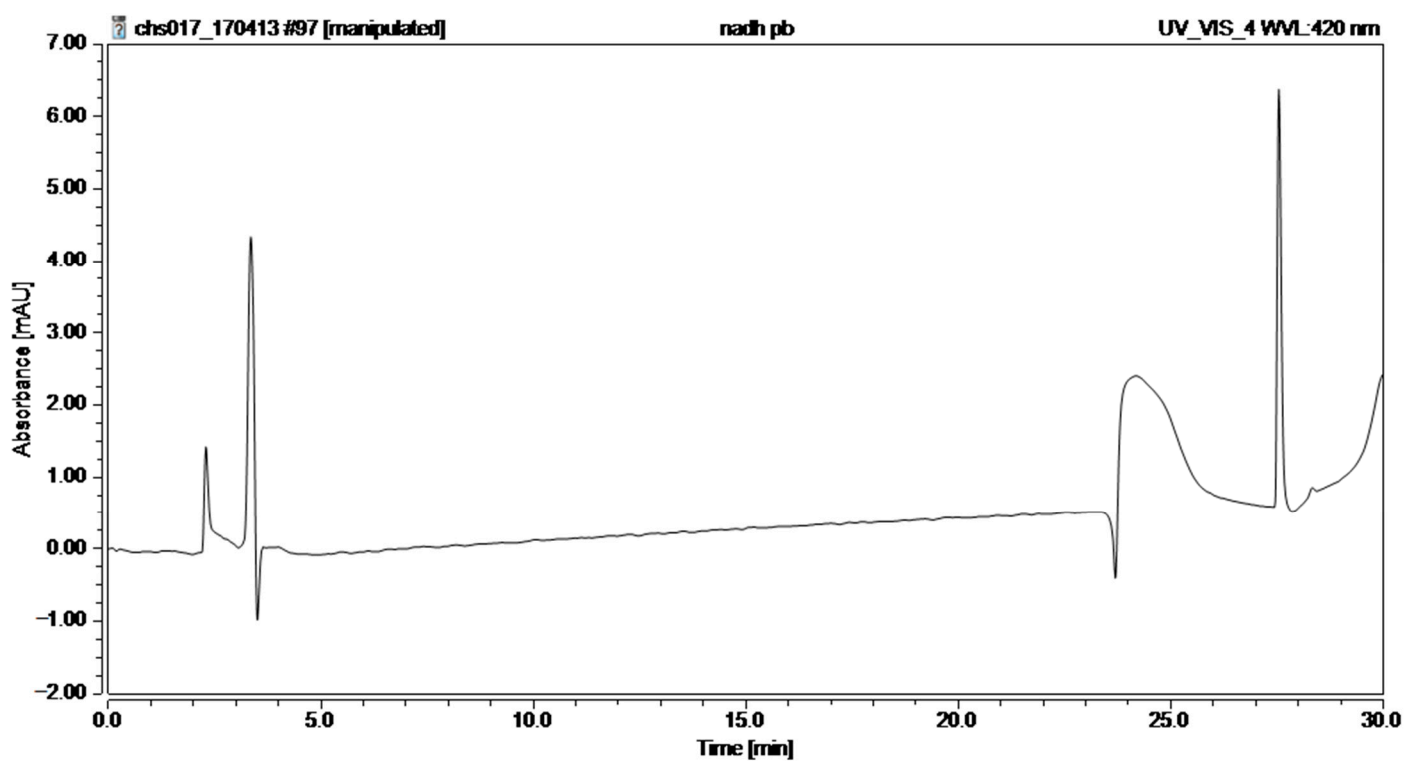

Figure S7. HPLC of a NADH standard.

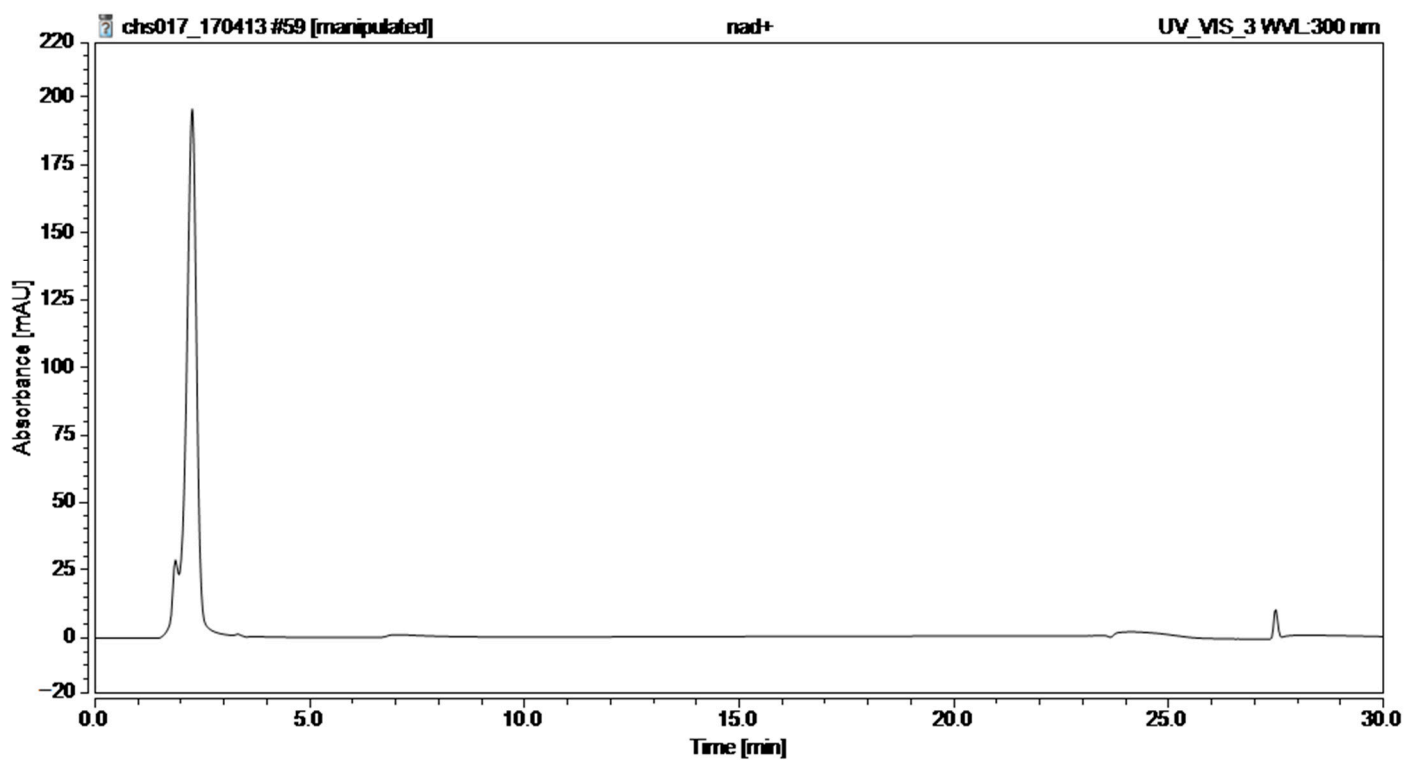Figure S8. HPLC of a NAD<sup>+</sup> standard.
